# Supplementary material for: Ru-doping induced lattice strain in hetero-phase Ni2P–Ni12P5arrays enables simultaneous efficient energy-saving hydrogen generation and formate electrosynthesis
Source: Royal Society of Chemistry journal article supplement (doi:10.1039/d2ta05151f), 2022-01-01
Supplement: d2ta05151f1.pdf [file d2ta05151f1.pdf]

### Electronic Supplementary Information

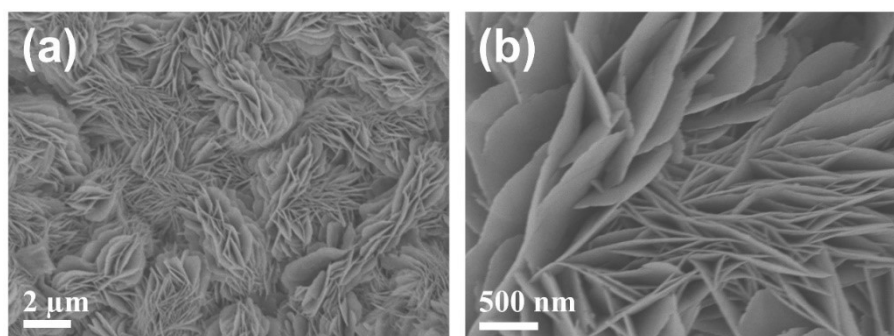

**Fig. S1** SEM images of the NiRu-MOF/NF.

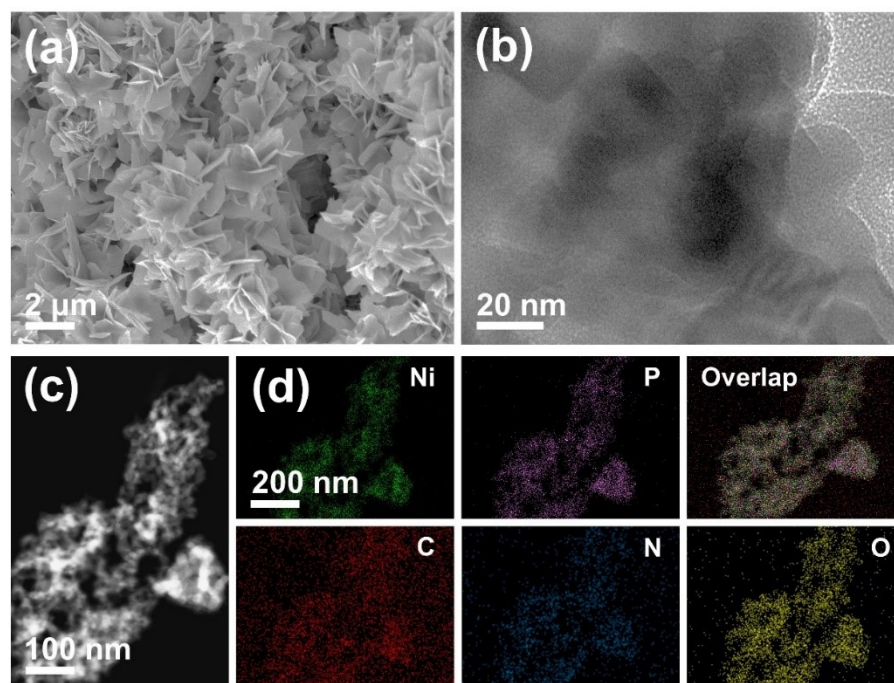

**Fig. S2** (a) SEM image of the Ni<sub>x</sub>P<sub>y</sub>/N-C/NF. (b) TEM image, (c) HAADF-STEM image and (d) corresponding element mappings of the Ni<sub>x</sub>P<sub>y</sub>/N-C.

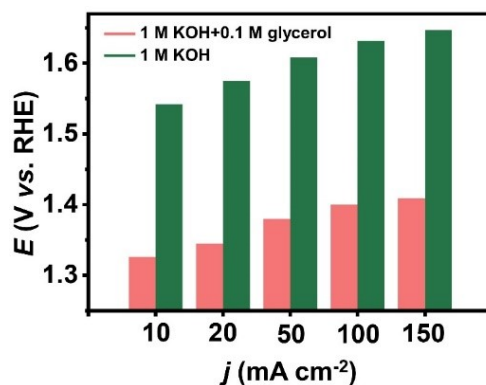

**Fig. S3** Comparison of required applied potentials at different anodic current densities on the Ru-Ni<sub>x</sub>P<sub>y</sub>/N-C/NF electrode measured in 1 M KOH solution with and without 0.1 M glycerol.

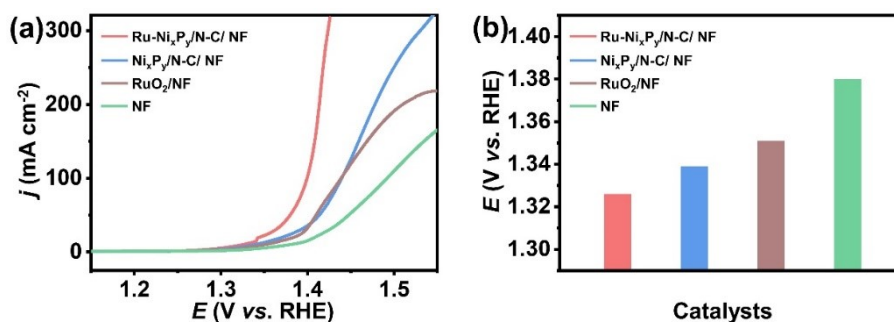

**Fig. S4** (a) LSV curves measured in a 1.0 M KOH solution containing 0.1 M glycerol for Ru-Ni<sub>x</sub>P<sub>y</sub>/N-C/NF, Ni<sub>x</sub>P<sub>y</sub>/N-C/NF, RuO<sub>2</sub>/NF and NF. (b) Comparison of required applied potentials at 10 mA cm<sup>-2</sup> for various catalysts.

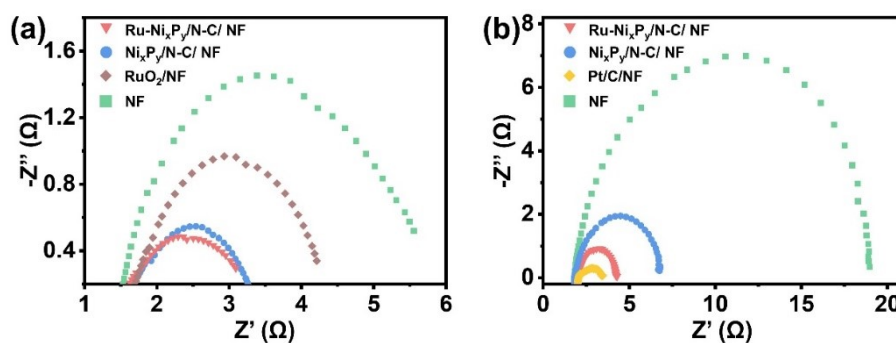

**Fig. S5** Electrochemical impedance spectra of various catalysts in 1 M KOH solutions with and without 0.1 M glycerol and at different potentials: (a) 1.45 V (vs. RHE), with 0.1 M glycerol; (b) - 0.20 V (vs. RHE), without glycerol.

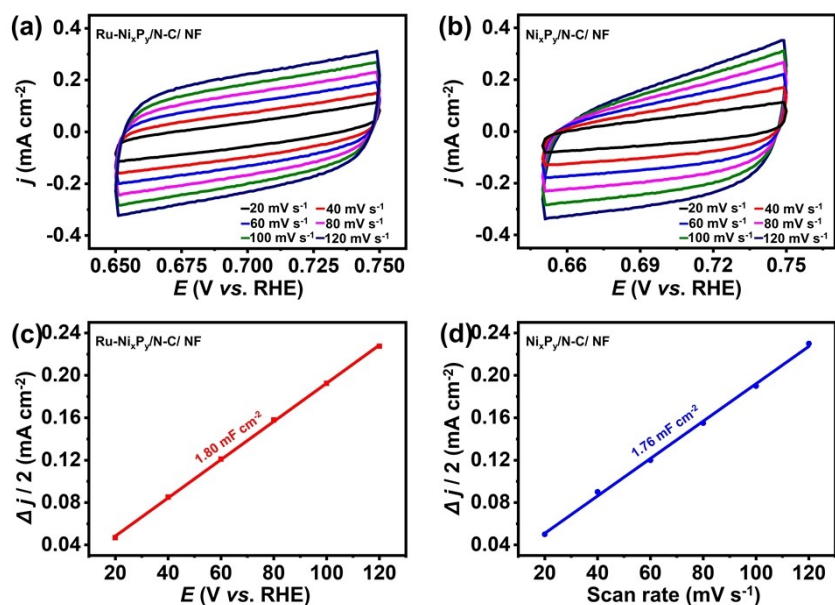

**Fig. S6** Electrochemical  $C_{dl}$  measurements of (a) Ru-Ni<sub>x</sub>P<sub>y</sub>/N-C/NF and (b) Ni<sub>x</sub>P<sub>y</sub>/N-C/NF at scan rates of 20, 40, 60, 80, 100, and 120 mV s<sup>-1</sup>. (c) Capacitance current density versus scan rate for (c) Ru-Ni<sub>x</sub>P<sub>y</sub>/N-C/NF and (d) Ni<sub>x</sub>P<sub>y</sub>/N-C/NF at 0.7 V (vs. RHE).

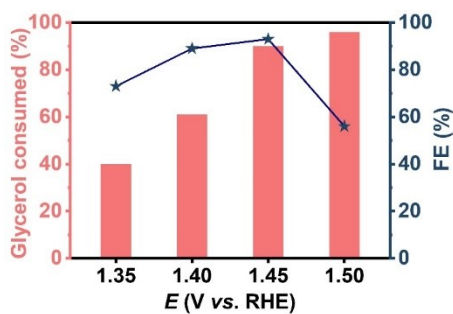

**Fig. S7** Glycerol consumed and formate FE for Ru-Ni<sub>x</sub>P<sub>y</sub>/N-C/NF electrode at different potentials in a 1 M KOH solution containing 0.1 M glycerol.

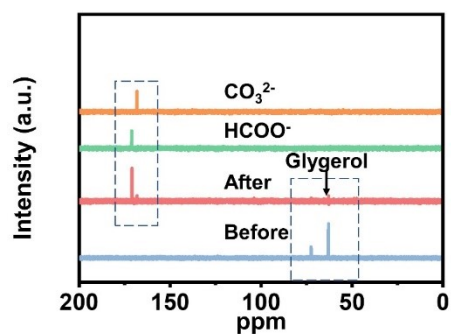

**Fig. S8** The  $^{13}\text{C}$  NMR spectra of the products of glycerol before and after 15 h of anodic oxidation, and the spectra of  $\text{HCOO}^-$  and  $\text{CO}_3^{2-}$ .

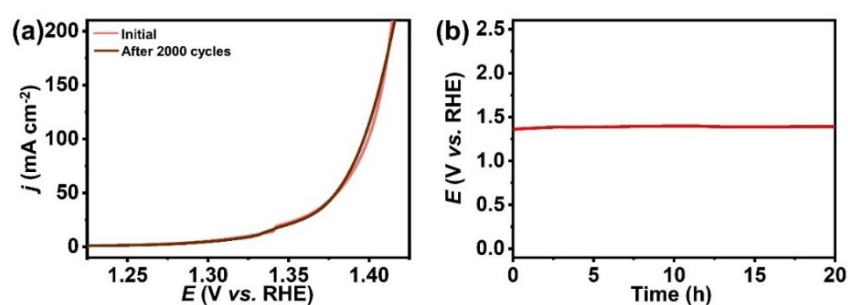

**Fig. S9** (a) GOR polarization curves of  $\text{Ru-Ni}_x\text{P}_y/\text{N-C/NF}$  at initial and after 2000 cycles. A fresh 1 M KOH solution containing 0.1 M glycerol was used when reported the LSV plot of 2000<sup>th</sup> cycle. (b) The V-t curves of  $\text{Ru-Ni}_x\text{P}_y/\text{N-C/NF}$  measured at  $10 \text{ mA cm}^{-2}$  for 20 h (without iR compensation).

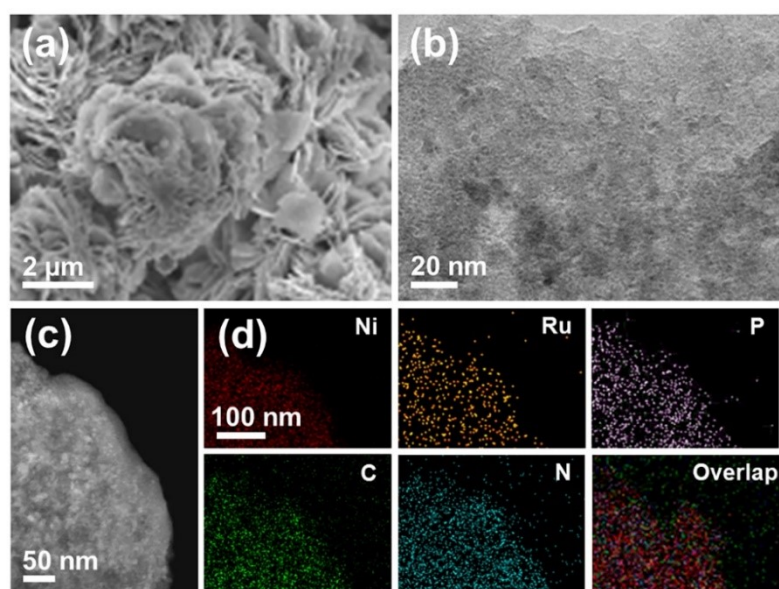

**Fig. S10** (a) SEM of post-HER  $\text{Ru-Ni}_x\text{P}_y/\text{N-C/NF}$ . (b) TEM, (c) HAADF-STEM and (d) corresponding element mappings of the post-GOR  $\text{Ru-Ni}_x\text{P}_y/\text{N-C}$ .

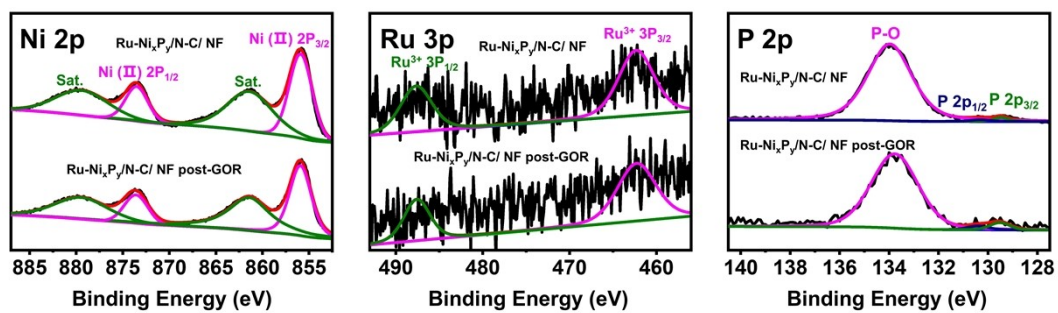

**Fig. S11** (a) Ni 2p, (b) Ru 3p and (c) P 2p XPS spectra of fresh and post-GOR Ru-Ni<sub>x</sub>P<sub>y</sub>/N-C samples.

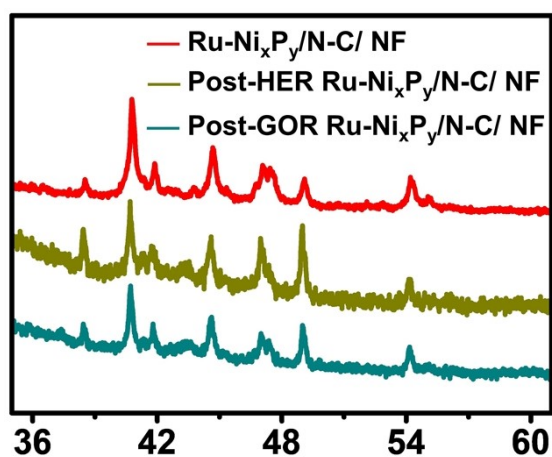

**Fig. S12** XRD patterns of fresh, post-GOR and post-HER Ru-Ni<sub>x</sub>P<sub>y</sub>/N-C samples.

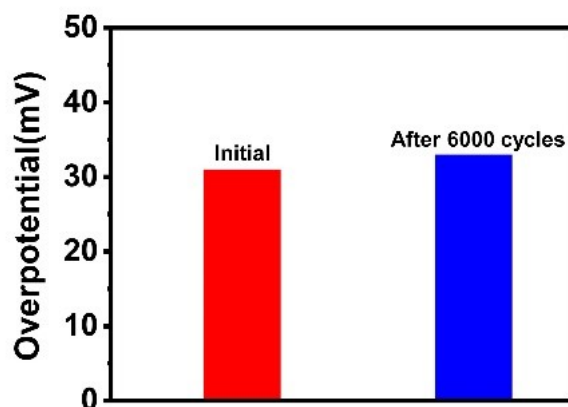

**Fig. S13** Comparison of required overpotentials at a HER current density of 10 mA cm<sup>-2</sup> for Ru-Ni<sub>x</sub>P<sub>y</sub>/N-C/NF before and after 6000 cycles.

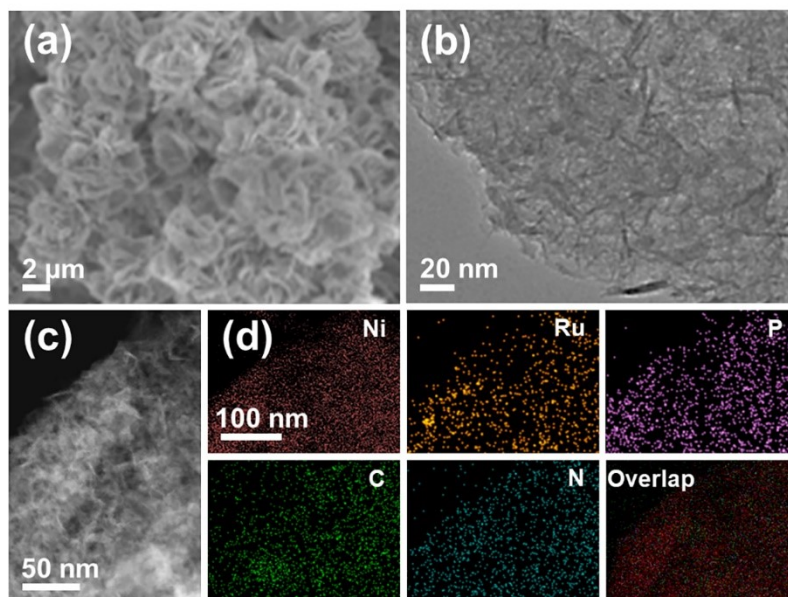

**Fig. S14** (a) SEM of post-HER Ru-Ni<sub>x</sub>P<sub>y</sub>/N-C/NF. (b) TEM, (c) HAADF-STEM and (d) corresponding element mappings of the post-HER Ru-Ni<sub>x</sub>P<sub>y</sub>/N-C.

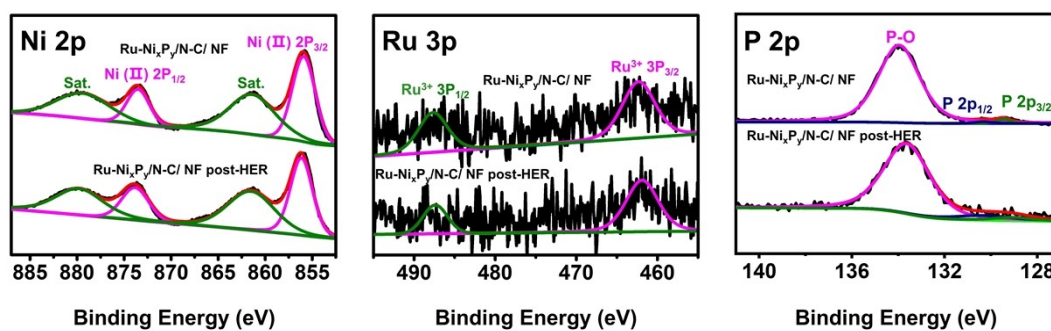

**Fig. S15** (a) Ni 2p, (b) Ru 3p and (c) P 2p XPS spectra of fresh and post-HER Ru-Ni<sub>x</sub>P<sub>y</sub>/N-C samples.

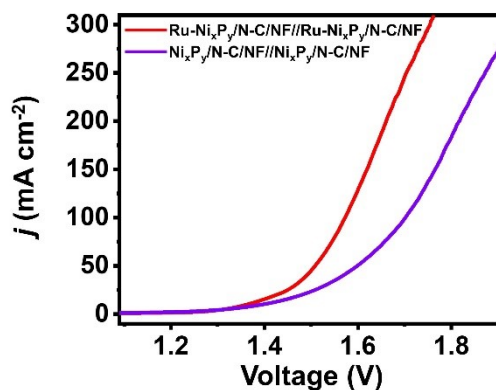

**Fig. S16** LSV plots for Ru-Ni<sub>x</sub>P<sub>y</sub>/N-C/NF//Ru-Ni<sub>x</sub>P<sub>y</sub>/N-C/NF system and Ni<sub>x</sub>P<sub>y</sub>/N-C/NF//Ni<sub>x</sub>P<sub>y</sub>/N-C/NF in a 1 M KOH solution with 0.1 M glycerol.

**Table S1.** Comparison of the hydrogen evolution and organic electrosynthesis performance of our Ru-Ni<sub>x</sub>P<sub>y</sub>/N-C/NF||Ru-Ni<sub>x</sub>P<sub>y</sub>/N-C/NF system and other reported bifunctional catalyst-based co-electrolysis systems.

| <b>Bifunctional catalysts</b>                               | <b>Electrolyte</b>                      | <b>Main anode product</b>   | <b>Cell voltage at 10 mA cm<sup>-2</sup> (V)</b> | <b>Ref.</b>      |
|-------------------------------------------------------------|-----------------------------------------|-----------------------------|--------------------------------------------------|------------------|
| <b>Ru-Ni<sub>x</sub>P<sub>y</sub>/N-C/NF</b>                | <b>1 M KOH+<br/>0.1 M glycerol</b>      | <b>Formate</b>              | <b>1.36</b>                                      | <b>This work</b> |
| NC/Ni-Mo-N/NF                                               | 1.0 M KOH+<br>0.1 M glycerol            | Formate                     | 1.38                                             | 1                |
| Ni <sub>3</sub> S <sub>2</sub> /NF                          | 1M KOH + 0.01 M 5-hydroxymethylfurfural | 2,5-furandicarboxylic acid  | 1.46                                             | 2                |
| Ni <sub>2</sub> P-UNMs/NF                                   | 1 M KOH +<br>0.125 M benzylamine        | Benzonitrile                | 1.41                                             | 3                |
| NiIr-MOF/NF                                                 | 1 M KOH +4 M methanol                   | Formate                     | 1.39                                             | 4                |
| Ni(OH) <sub>2</sub> /NF                                     | 1 M KOH +<br>0.5 M methanol             | Formate                     | 1.52                                             | 5                |
| Ni <sub>0.33</sub> Co <sub>0.67</sub> (OH) <sub>2</sub> /NF | 1 M KOH +<br>0.5 M methanol             | Formate                     | 1.5                                              | 6                |
| Co <sub>3</sub> S <sub>4</sub> -NSs/Ni-F                    | 1.0 M KOH + 0.5 M ethanol               | Acetate                     | 1.48                                             | 7                |
| Co-Ni alloy                                                 | 1 M KOH +<br>0.1 M glucose              | Gluconolactone,<br>gluconic | 1.39                                             | 8                |
| Co-S-P/CC                                                   | 1.0 M KOH + 1.0 M ethanol               | Acetic acid                 | 1.63                                             | 9                |

## References

1. Y. Xu, M. Liu, S. Wang, K. Ren, M. Wang, Z. Wang, X. Li, L. Wang, H. Wang, *Appl. Cataly. B Environ.*, 2021, **298**, 120493.
2. B. You, X. Liu, N. Jiang, Y. Sun, *J. Am. Chem. Soc.*, 2016, **138**, 13639-13646.
3. Y. Ding, B.-Q. Miao, S.-N. Li, Y.-C. Jiang, Y.-Y. Liu, H.-C. Yao, Y. Chen, *Appl. Cataly. B Environ.*, 2020, **268**, 118393.
4. Y. Xu, M. Liu, M. Wang, T. Ren, K. Ren, Z. Wang, X. Li, L. Wang, H. Wang, *Appl. Cataly. B Environ.*, 2022, **300**, 120753.
5. J. Hao, J. Liu, D. Wu, M. Chen, Y. Liang, Q. Wang, L. Wang, X.-Z. Fu, J.-L. Luo, *Appl. Cataly. B Environ.*, 2021, **281**, 119510.
6. M. Li, X. Deng, K. Xiang, Y. Liang, B. Zhao, J. Hao, J.L. Luo, X.Z. Fu, *ChemSusChem.*, 2020, **13**, 914-921.
7. Y. Ding, Q. Xue, Q.L. Hong, F.M. Li, Y.C. Jiang, S.N. Li, Y. Chen, *ACS. Appl. Mater. Inter.*, 2021, **13**, 4026-4033.
8. C. Lin, P. Zhang, S. Wang, Q. Zhou, B. Na, H. Li, J. Tian, Y. Zhang, C. Deng, L. Meng, J. Wu, C. Liu, J. Hu, L. Zhang, *J. Alloy. Compd.*, 2020, **823**, 153784.
9. S. Sheng, K. Ye, L. Sha, K. Zhu, Y. Gao, J. Yan, G. Wang, D. Cao, *Inorg. Chem. Front.*, 2020, **7**, 4498-4506.
